# Supplementary material for: Enhancing the multi-functional properties of renewable lignin carbon fibers via defining the structure–property relationship using different biomass feedstocks
Source: Royal Society of Chemistry journal article supplement (doi:10.1039/d0gc03828h), 2021-01-01
Supplement: d0gc03828h1.pdf [file d0gc03828h1.pdf]

1 **Supplementary for:**

2 **Enhancing Multifunctional Properties of Renewable Lignin Carbon Fiber via Defining**

3 **Structure-Property Relationship Using Different Biomass Feedstock**

4 Qiang Li<sup>1,2</sup>, Cheng Hu<sup>1,2</sup>, Mengjie Li<sup>1,2</sup>, Phuc Truong<sup>3</sup>, Jinghao Li<sup>1,2</sup>, Hao-Sheng Lin<sup>1,4</sup>, Mandar

5 T. Naik<sup>5</sup>, Sisi Xiang<sup>6</sup>, Brian E. Jackson<sup>7</sup>, Winson Kuo<sup>6</sup>, Wenhao Wu<sup>8</sup>, Yunqiao Pu<sup>9</sup>, Arthur J.

6 Ragauskas<sup>9,10,11</sup>, Joshua S. Yuan<sup>1,2\*</sup>

7 <sup>1</sup>Synthetic and Systems Biology Innovation Hub, Department of Plant Pathology and  
8 Microbiology, Texas A&M University, College Station, TX 77843, USA

9 <sup>2</sup>Department of Chemical Engineering, Texas A&M University, College Station, TX 77843,  
10 USA

11 <sup>3</sup>Soft Matter Facility, Texas A&M University, College Station, TX 77843, USA

12 <sup>4</sup>Department of Soil and Crop Science, Texas A&M University, College Station, TX 77843,  
13 USA

14 <sup>5</sup>Department of Molecular Pharmacology, Physiology and Biotechnology,  
15 Brown University, Providence, RI 02903, USA

16 <sup>6</sup>Materials Characterization Facility, Texas A&M University, College Station, TX 77843, USA

17 <sup>7</sup>Department of Horticultural Science, North Carolina State University, Raleigh, NC 27695, USA

18 <sup>8</sup>Department of Physics and Astronomy, Texas A&M University, College Station, TX 77843,  
19 USA

20 <sup>9</sup>Joint Institute for Biological Sciences, Biosciences Division, Oak Ridge National Laboratory,  
21 Oak Ridge, TN 37831, USA

22 <sup>10</sup>Department of Chemical and Biomolecular Engineering, The University of Tennessee,  
23 Knoxville, TN 37996-2200, USA

24 <sup>11</sup>Department of Forestry, Wildlife and Fisheries, Center for Renewable Carbon, Institute of  
25 Agriculture, The University of Tennessee, Knoxville, TN 37996-2200, USA

26 \*For correspondence: Joshua S. Yuan: [syuan@tamu.edu](mailto:syuan@tamu.edu)

27

28

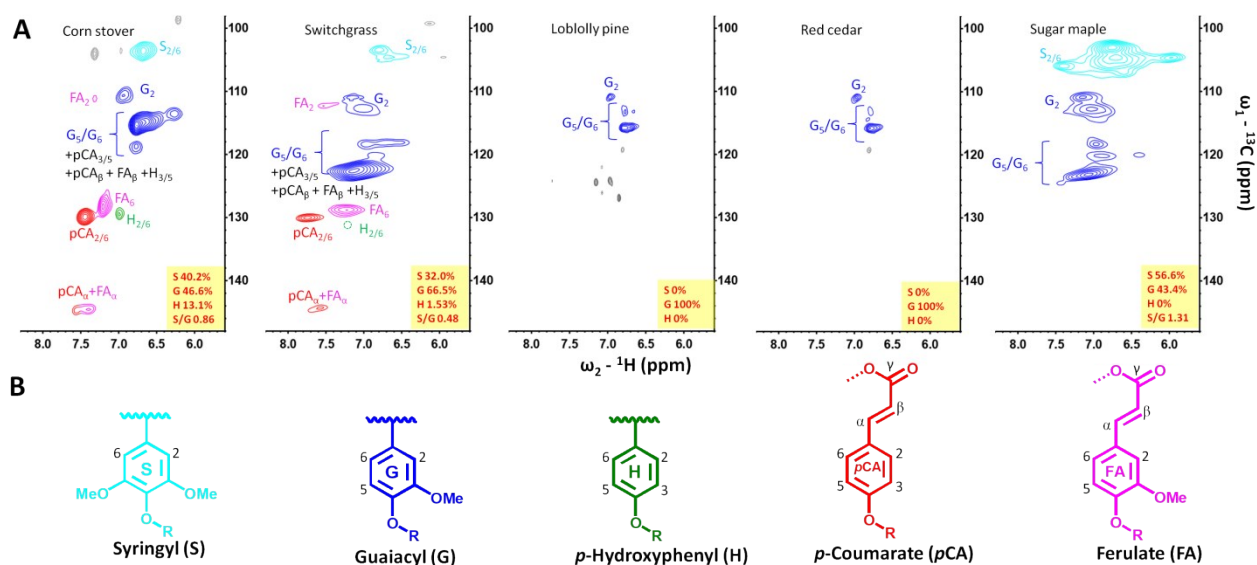

30 Fig S1. Aromatic region of 2D HSQC NMR spectra of lignin. S/G/H ratios were semi-quantified  
31 from the volume integration. The chemical structures of S, G, H, pCA and FA are in panel B.

32 The chemical shifts of these structures were in Table S1.

33

34

**Table S1.** Assignments of lignin chemical structures in 2D HSQC NMR.<sup>1,2</sup>

| Lignin structures*                                                                      | F2<br>(ppm) | F1<br>(ppm) |
|-----------------------------------------------------------------------------------------|-------------|-------------|
| I $\alpha$ ( $\alpha$ position in $\beta$ -O-4')                                        | 5.0         | 74.5        |
| II $\alpha$ ( $\alpha$ position in $\beta$ -5')                                         | 5.5         | 87.7        |
| III $\alpha$ ( $\alpha$ position in $\beta$ - $\beta'$ )                                | 4.7         | 85.0        |
| C <sub>2</sub> /H <sub>2</sub> in guaiacyl units (G <sub>2</sub> )                      | 6.8         | 111.3       |
| C <sub>2,6</sub> /H <sub>2,6</sub> in <i>p</i> -hydroxyphenyl units (H <sub>2/6</sub> ) | 7.3         | 127.2       |
| C <sub>2,6</sub> /H <sub>2,6</sub> in syringyl units (S <sub>2/6</sub> )                | 6.7         | 103.8       |
| C <sub>2,6</sub> /H <sub>2,6</sub> in <i>p</i> -Coumarate (pCA <sub>2,6</sub> )         | 7.6         | 130.0       |
| C $\alpha$ /H $\alpha$ in <i>p</i> -Coumarate (pCA $\alpha$ )                           | 7.6         | 145.0       |
| C <sub>2</sub> /H <sub>2</sub> in Ferulate (FA <sub>2</sub> )                           | 7.5         | 111.5       |
| C <sub>6</sub> /H <sub>6</sub> in Ferulate (FA <sub>6</sub> )                           | 7.3         | 128.3       |
| C $\alpha$ /H $\alpha$ in Ferulate (FA $\alpha$ )                                       | 7.5         | 144.5       |

35

\*Lignin linkages and units are shown in Fig. S1 and Fig. 7, respectively.

36

37

Table S2. Ash content of lignin samples.

| Lignin samples | Ash content (%) |
|----------------|-----------------|
| Corn stover    | 0.52            |
| Switchgrass    | 0.10            |
| Loblolly pine  | 0.10            |
| Red cedar      | 0.11            |
| Sugar maple    | 0.10            |

38

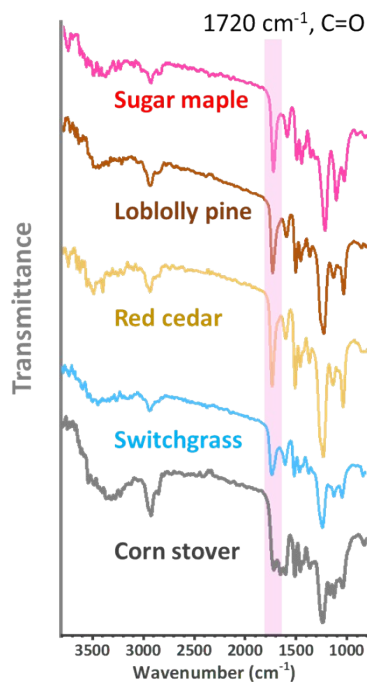

39

40 Fig. S2. FTIR spectra of lignin (3800-800  $\text{cm}^{-1}$ ). The peaks at about  $1720 \text{ cm}^{-1}$  were assigned to  
 41 the stretching vibrations of carbonyl groups in lignin.

42

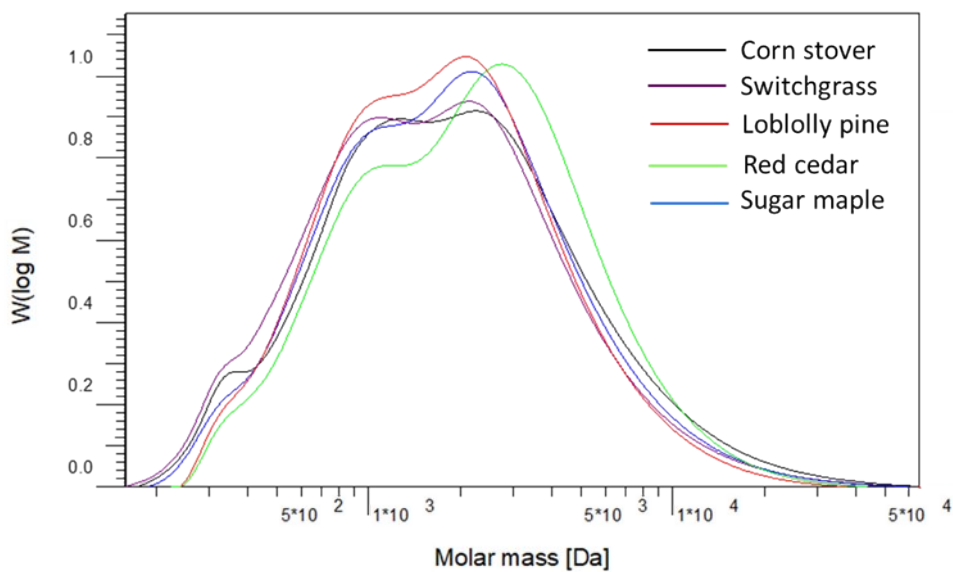

43

44

**Fig. S3. GPC spectra of lignin from different biomass.**

45

46

Table S3. Molecular weight and polydispersity index (PDI) of lignin.

| Lignin samples | Mn   | Mw   | PDI  |
|----------------|------|------|------|
| Corn stover    | 1245 | 3056 | 2.45 |
| Switchgrass    | 1127 | 2633 | 2.33 |
| Loblolly pine  | 1270 | 2533 | 1.99 |
| Red cedar      | 1462 | 3096 | 2.11 |
| Sugar maple    | 1257 | 2791 | 2.22 |

47

48

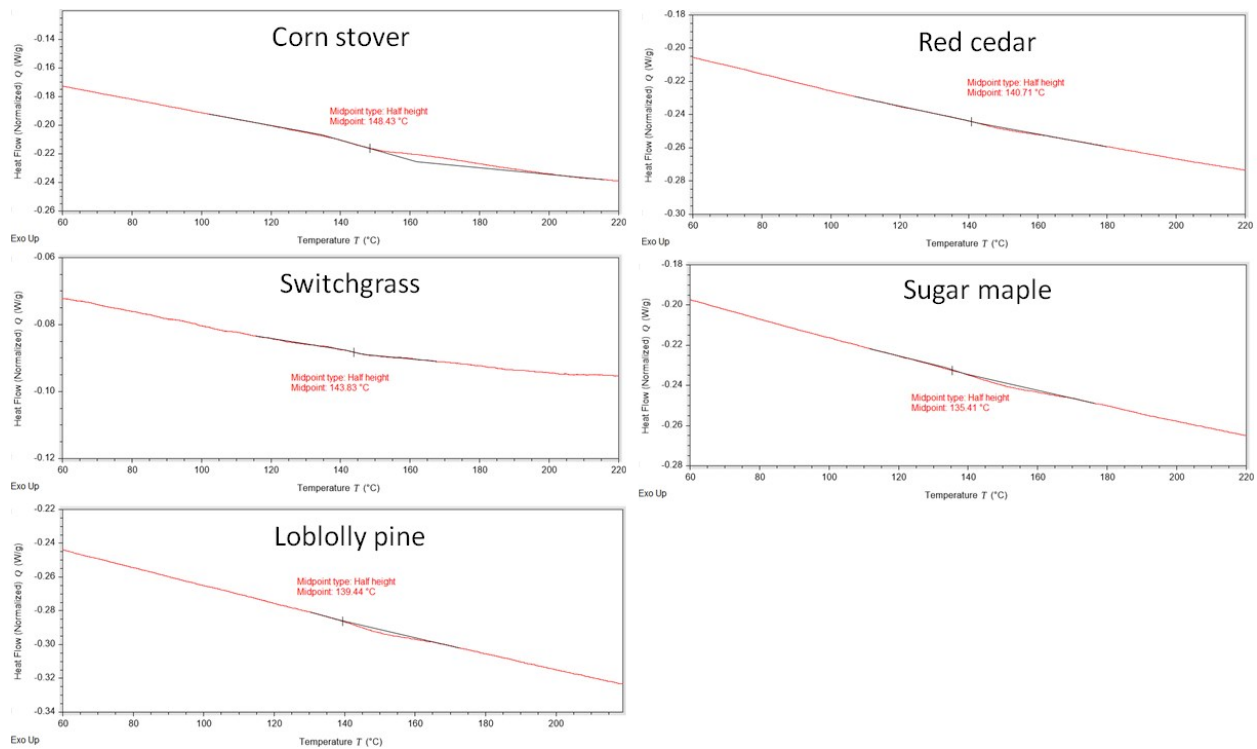

49

50 Fig. S4. The second heating cycles (60-220 °C) of DSC thermograms of lignin-based fibers. The  
51 glass transition temperatures ( $T_g$ ) were calculated using TRIOS software (TA Instrument) and  
52 given in each figure.

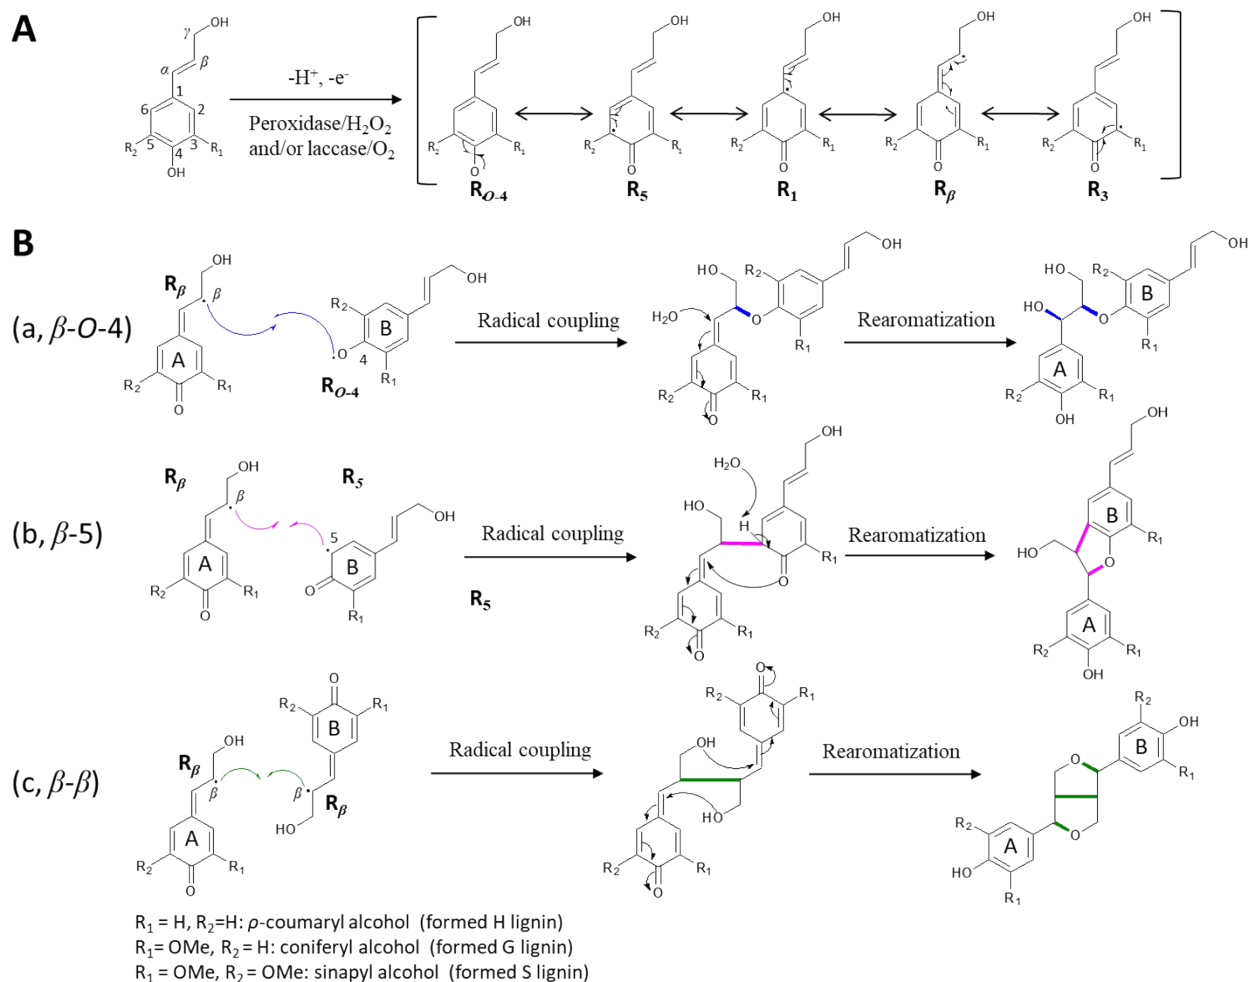

55 Fig. S5. Formation of lignin interunitary linkages during lignin polymerization. A, radical  
 56 formation by monolignol oxidation with oxidase and followed by radical delocalization.  $R_{O-4}$ ,  $R_5$ ,  
 57  $R_1$ ,  $R_\beta$ , and  $R_3$  represented radicals formed on  $C_4$ -O,  $C_5$ ,  $C_1$ ,  $C_\beta$ , and  $C_3$  positions, respectively. B,  
 58 radical-radical coupling to form  $\beta$ -O-4,  $\beta$ -5, and  $\beta$ - $\beta$  linkages using monolignol dimerization as  
 59 an example. The newly formed bonds in radical coupling and re-aromatization were highlighted  
 60 in bold. The image was drawn based on the Morreel et al (2010)<sup>3</sup> and Vanholme et al (2010).<sup>4</sup>

62

63

Table S4. The yields of carbon fibers made from different biomass.

| Lignin samples | Carbonization (%) <sup>a</sup> |
|----------------|--------------------------------|
| Corn stover    | 51.3                           |
| Switchgrass    | 52.6                           |
| Loblolly pine  | 56.6                           |
| Red cedar      | 57.0                           |
| Sugar maple    | 59.4                           |

64

<sup>a</sup> % is based on as-spun fibers.

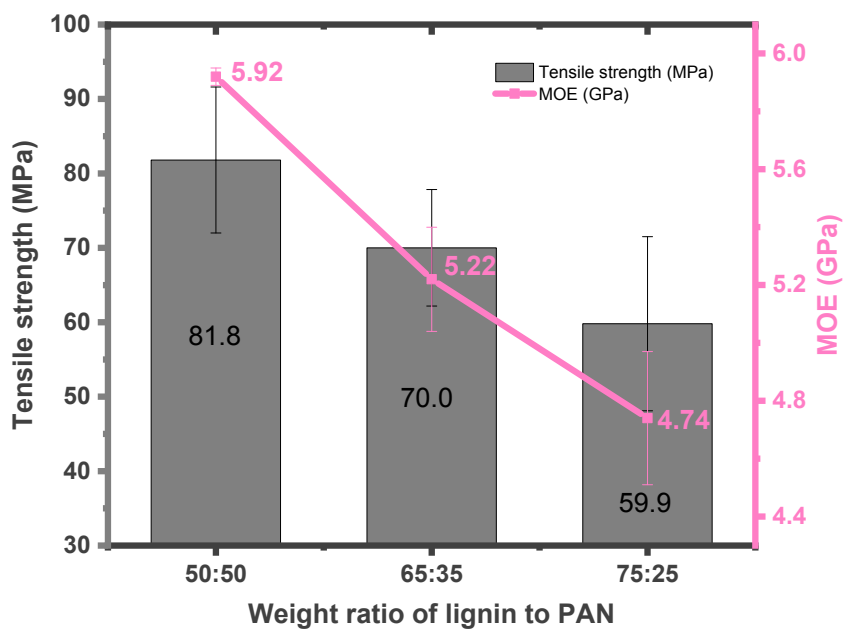

65

66 Fig. S6. Mechanical properties of the as-spun fibers made of lignin/PAN at different weight  
67 ratios of 50:50, 65:35, and 75:25.

68

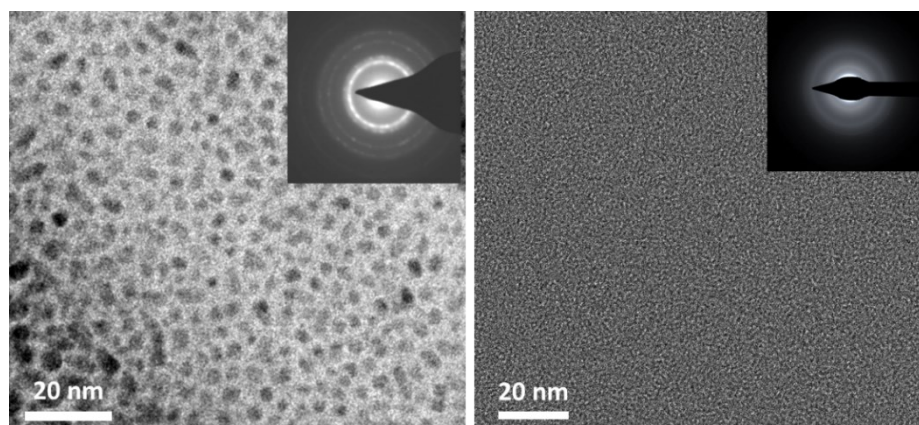

69

70 Fig. S7. TEM and electronic diffraction image of carbon fibers made of pure PAN (left) and  
 71 hardwood lignin/PAN blend (right).

72 Table S5. Comparisons of lignin-based carbon fiber (CF-Lig) with pure PAN-based carbon fiber  
 73 (CF-PAN) as obtained in this study and in other reports.

| Ref.                             | Lignin                | Blend                | Lignin / blend | Spin            | MOE (GPa)   |             |                          | Tensile strength (MPa) |             |                          | Elongation (%) |                |                          |
|----------------------------------|-----------------------|----------------------|----------------|-----------------|-------------|-------------|--------------------------|------------------------|-------------|--------------------------|----------------|----------------|--------------------------|
|                                  |                       |                      |                |                 | CF-Lig      | CF-PAN      | Ratio <sup>a</sup>       | CF-Lig                 | CF-PAN      | Ratio <sup>a</sup>       | CF-Lig         | CF-PAN         | Ratio <sup>a</sup>       |
| Lin et al (2014) <sup>5</sup>    | SW PEG lignin         | n.d.                 | n.d.           | Melt spin       | 26.2        | 200-500     | <b>0.131<sup>b</sup></b> | 457                    | 3500 - 6300 | <b>0.131<sup>b</sup></b> | <b>2.11</b>    | <b>0.8-2.2</b> | <b>2.638<sup>b</sup></b> |
| Thunga et al (2014) <sup>6</sup> | SW Kraft lignin       | PLA                  | 1:1            | Extrusion       | 0.0225      | 6.4         | <b>0.004</b>             | 17.5                   | 41          | <b>0.427</b>             | n.d.           | n.d.           | n.d.                     |
| Ding et al (2016) <sup>7</sup>   | CS organo solv lignin | PAN (MW 150K)        | 1:1            | Electro-spin    | 2.4         | 6.4         | <b>0.375</b>             | 22                     | 41          | <b>0.537</b>             | <b>1.2</b>     | <b>0.8</b>     | <b>1.50</b>              |
| Liu et al (2017) <sup>8</sup>    | Soda lignin           | PAN (MW 250K)        | 3:7            | Gel spin        | 194         | 193         | <b>1.005</b>             | 1370                   | 1540        | <b>0.890</b>             | <b>0.72</b>    | <b>0.83</b>    | <b>0.867</b>             |
| Jin et al (2018) <sup>9</sup>    | SW Kraft lignin       | PAN (MW 233K)        | 1:1            | Wet spin        | 105.7       | 155.2       | <b>0.681</b>             | 1200                   | 1380        | <b>0.870</b>             | <b>1.1</b>     | <b>0.9</b>     | <b>1.222</b>             |
| <b>This paper</b>                | <b>HW AA lignin</b>   | <b>PAN (MW 150K)</b> | <b>1:1</b>     | <b>Wet spin</b> | <b>40.4</b> | <b>40.5</b> | <b>0.998</b>             | <b>472</b>             | <b>453</b>  | <b>1.042</b>             | <b>1.51</b>    | <b>1.40</b>    | <b>1.079</b>             |

74 a, the ratios in the table represented the ratio of CF-Lig mechanical properties to that of the CF-PAN; b, calculated  
 75 from the low end of PAN-based carbon fiber. CF-Lig, lignin-based carbon fiber; CF-PAN, PAN-based carbon fiber;  
 76 MOE, modulus of elasticity; PLA, polylactic acid; MW, molecular weight; AA lignin, acetic acid lignin; PEG,  
 77 polyethylene glycol; n.d., no data.

78



## 79 Reference

- 80 1 Mansfield, S. D., Kim, H., Lu, F. & Ralph, J. Whole plant cell wall characterization using  
81 solution-state 2D NMR. *Nat. Protocols* **7**, 1579-1589 (2012).
- 82 2 Li, Q. *et al.* Quality carbon fibers from fractionated lignin. *Green Chem.* **19**, 1628-1634  
83 (2017).
- 84 3 Morreel, K. *et al.* Mass Spectrometry-Based Sequencing of Lignin Oligomers. *Plant*  
85 *Physiol.* **153**, 1464-1478 (2010).
- 86 4 Vanholme, R., Demedts, B., Morreel, K., Ralph, J. & Boerjan, W. Lignin Biosynthesis  
87 and Structure. *Plant Physiol.* **153**, 895-905 (2010).
- 88 5 Lin, J. *et al.* Improvement of Mechanical Properties of Softwood Lignin-Based Carbon  
89 Fibers. *J. Wood Chem. Technol.* **34**, 111-121 (2014).
- 90 6 Thunga, M., Chen, K., Grewell, D. & Kessler, M.R. Bio-renewable precursor fibers from  
91 lignin/polylactide blends for conversion to carbon fibers. *Carbon* **68**, 159-166 (2014).
- 92 7 Ding, R., Wu, H., Thunga, M., Bowler, N. & Kessler, M.R. Processing and  
93 characterization of low-cost electrospun carbon fibers from organosolv  
94 lignin/polyacrylonitrile blends. *Carbon* **100**, 126-136, (2016).
- 95 8 Liu, H.C., Chien, A.-T., Newcomb, B.A., Liu, Y. & Kumar, S. Processing, structure, and  
96 properties of lignin- and cnt-incorporated polyacrylonitrile-based carbon fibers. *ACS*  
97 *Sustain. Chem. Eng.* **3**, 1943-1954 (2015).
- 98 9 Jin, J. & Ogale, A.A. Carbon fibers derived from wet-spinning of equi-component  
99 lignin/polyacrylonitrile blends. *J. Appl. Polym. Sci.* **135**, 45903 (2018).

100
